# Supplementary material for: Risk factors of chronic pain after inguinal hernia repair: a systematic review
Source: PubMed Central journal article supplement — Innov Surg Sci. 2017 May 12;2(2):61–8. doi: 10.1515/iss-2017-0017 (PMC6754000; doi:10.1515/iss-2017-0017), 2017-05-12
Supplement: iss-2-20170017-s001.pdf [file iss-2-20170017-s001.pdf]

## Reviewer Assessment

## Open Access

Wolfgang Reinpold\*

# Risk factors of chronic pain after inguinal hernia repair: a systematic review

DOI 10.1515/iss-2017-0017

Received March 15, 2017; accepted March 20, 2017

\*Corresponding author: Wolfgang Reinpold,

Department of Surgery and Reference Hernia Center, Gross-Sand Hospital Hamburg, Teaching Hospital of Hamburg University, Gross-Sand 3, D-21107 Hamburg, Germany, E-mail: w.reinpold@gross-sand.de; and Wilhelmsburger Krankenhaus Groß-Sand, Groß-Sand 3, D-21107 Hamburg, Germany

## Reviewers' Comments to Original Submission

### Reviewer 1: anonymous

Mar 15, 2017

|                                                                   |                 |
|-------------------------------------------------------------------|-----------------|
| <b>Reviewer Recommendation Term:</b>                              | Accept          |
| <b>Overall Reviewer Manuscript Rating:</b>                        | 80              |
| <b>Custom Review Questions</b>                                    | <b>Response</b> |
| Is the subject area appropriate for you?                          | 5 - High/Yes    |
| Does the title clearly reflect the paper's content?               | 5 - High/Yes    |
| Does the abstract clearly reflect the paper's content?            | 5 - High/Yes    |
| Do the keywords clearly reflect the paper's content?              | 5 - High/Yes    |
| Does the introduction present the problem clearly?                | 4               |
| Are the results/conclusions justified?                            | 4               |
| How comprehensive and up-to-date is the subject matter presented? | 4               |
| How adequate is the data presentation?                            | 4               |
| Are units and terminology used correctly?                         | N/A             |
| Is the number of cases adequate?                                  | N/A             |
| Are the experimental methods/clinical studies adequate?           | N/A             |
| Is the length appropriate in relation to the content?             | 4               |
| Does the reader get new insights from the article?                | 4               |
| Please rate the practical significance.                           | 4               |
| Please rate the accuracy of methods.                              | 3               |
| Please rate the statistical evaluation and quality control.       | 3               |
| Please rate the appropriateness of the figures and tables.        | 3               |
| Please rate the appropriateness of the references.                | 5 - High/Yes    |
| Please evaluate the writing style and use of language.            | 4               |
| Please judge the overall scientific quality of the manuscript.    | 4               |
| Are you willing to review the revision of this manuscript?        | Yes             |

**Comments to Authors:**

This is a nicely presented topic of a highly significant clinical issue. It shows, that many potential risk factors for chronic pain after inguinal hernia repair exist. Although some of the risk factors are well known, the paper gives a comprehensive overview so that hopefully many surgeons who treat these patients will benefit from the data. Additionally, it shows that in particular in open surgery a meticulous surgical technique is crucial to identify and preserve the nerves.

---

**Reviewer 2: Timm Franzke**

Mar 18, 2017

---

**Reviewer Recommendation Term:**

Accept

**Overall Reviewer Manuscript Rating:**

N/A

**Custom Review Questions****Response**

|                                                                   |              |
|-------------------------------------------------------------------|--------------|
| Is the subject area appropriate for you?                          | 5 - High/Yes |
| Does the title clearly reflect the paper's content?               | 5 - High/Yes |
| Does the abstract clearly reflect the paper's content?            | 5 - High/Yes |
| Do the keywords clearly reflect the paper's content?              | 5 - High/Yes |
| Does the introduction present the problem clearly?                | 4            |
| Are the results/conclusions justified?                            | 4            |
| How comprehensive and up-to-date is the subject matter presented? | 4            |
| How adequate is the data presentation?                            | 4            |
| Are units and terminology used correctly?                         | 4            |
| Is the number of cases adequate?                                  | 4            |
| Are the experimental methods/clinical studies adequate?           | 3            |
| Is the length appropriate in relation to the content?             | 4            |
| Does the reader get new insights from the article?                | 5 - High/Yes |
| Please rate the practical significance.                           | 5 - High/Yes |
| Please rate the accuracy of methods.                              | 4            |
| Please rate the statistical evaluation and quality control.       | 3            |
| Please rate the appropriateness of the figures and tables.        | 3            |
| Please rate the appropriateness of the references.                | 4            |
| Please evaluate the writing style and use of language.            | 4            |
| Please judge the overall scientific quality of the manuscript.    | 4            |
| Are you willing to review the revision of this manuscript?        | Yes          |

**Comments to Authors:**

-

---
